# Supplementary material
Source: publisher figshare collection journal article supplement (https://karger.figshare.com/ndownloader/files/26599259)

**Supplemental Figure 1.** Summary assessment of risk of bias for randomized clinical trials using Rob2 tool.


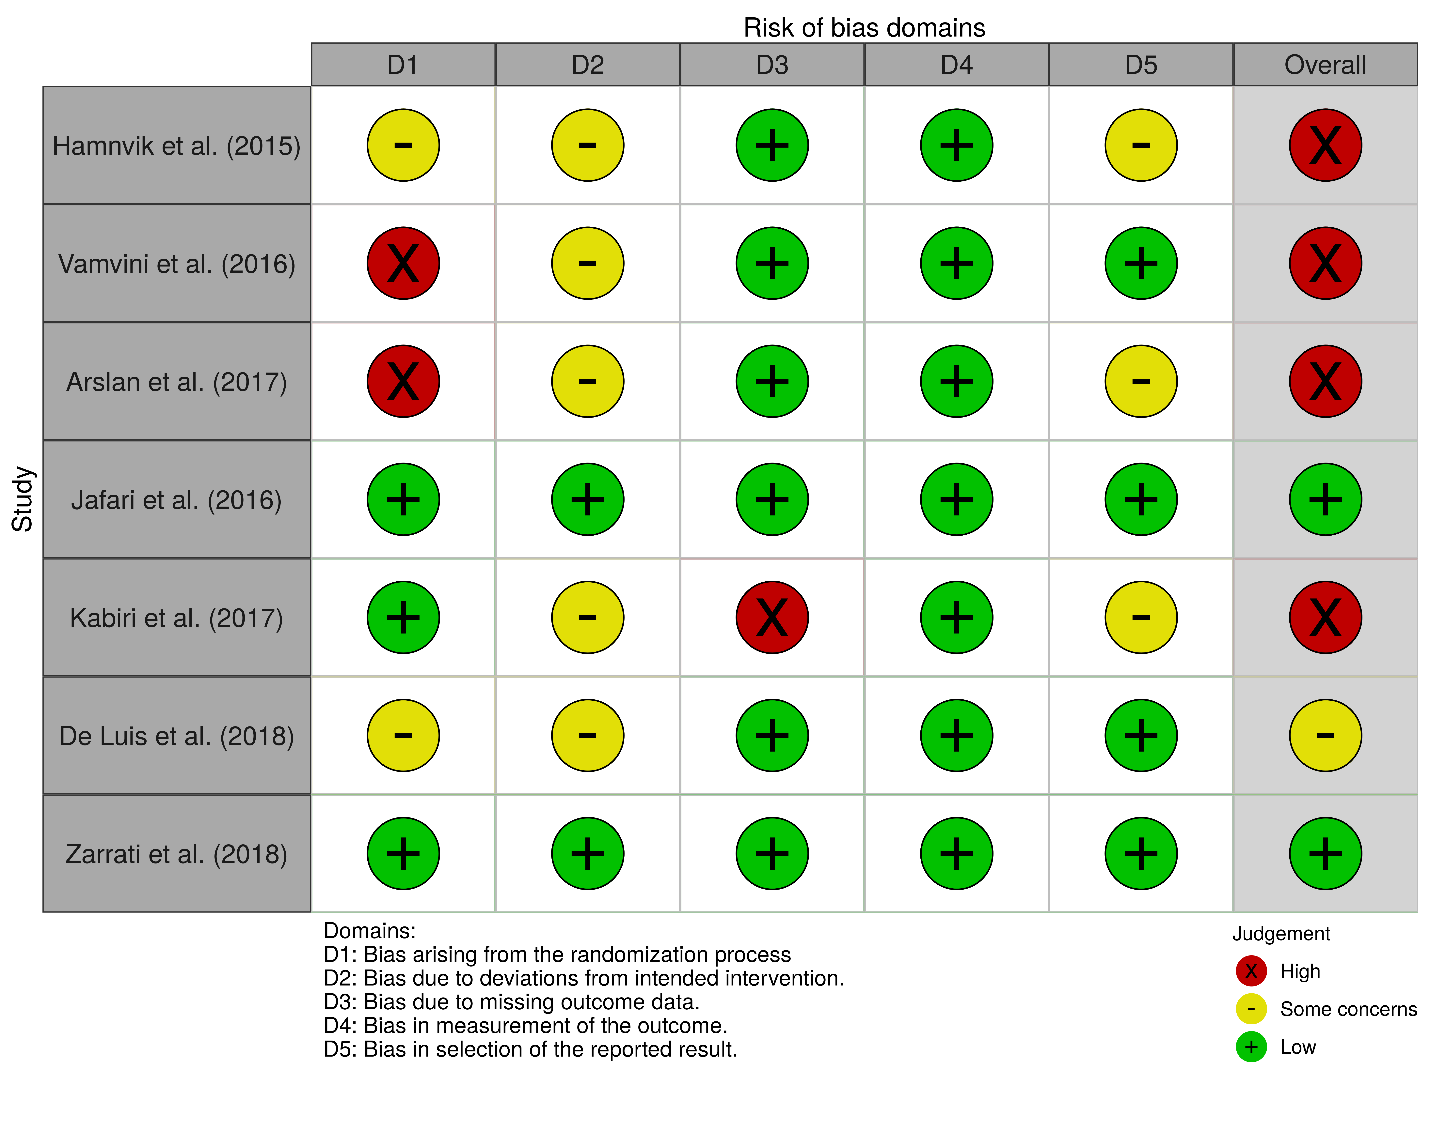

Supplement: Supplementary file 1 [file 26599259]
